# Supplementary material for: A dual-response fluorescence sensor for SO2 derivatives and polarity and its application in real water and food samples
Source: Royal Society of Chemistry journal article supplement (doi:10.1039/d4ra04805a), 2024-01-01
Supplement: d4ra04805a1.pdf [file d4ra04805a1.pdf]

## **A dual-response fluorescence sensor for SO<sub>2</sub> derivatives and polarity, and the application in real water and food samples**

Jianfeng Wang<sup>a#</sup>, Ruiji Li<sup>b#</sup>, Tao Ou<sup>b</sup>, Yamin Fu<sup>c</sup>, Chang Gao<sup>a</sup>, Yehao Yan<sup>a\*</sup>

*<sup>a</sup>School of Public Health, Jining Medical University, Jining, Shandong, 272067, P.R. China*

*<sup>b</sup>School of Pharmacy, Jining Medical University, Rizhao, Shandong, 276826, P.R. China*

*<sup>c</sup>School of Chemistry and Chemical Engineering, Hainan University, Haikou 570228, P. R. China.*

*\*Corresponding author*

*E-mail address: [yanyehao\\_322@163.com](mailto:yanyehao_322@163.com) (Y. Yan)*

*#Equal contribution*

## Table of Content

Scheme S1 The synthesis route of donor.

Fig. S1 The HRMS of TLA.

Fig. S2 The  $^1\text{H}$  NMR of TLA.

Fig. S3 The  $^{13}\text{C}$  NMR of TLA.

Fig. S4 The  $^1\text{H}$  NMR of donor.

Fig. S5 The overlap of the normalized fluorescence spectra of donor and the absorbance spectra of acceptor.

Fig. S6 The energy transfer efficiency.

Fig. S7 HOMO and LUMO of TLA by DFT calculations.

Fig. S8 The fluorescence of TLA relying on the variation of pH condition.

Fig. S9 The HRMS of the addition product.

Fig. S10  $^1\text{H}$  NMR of the addition product.

Table S1 Comparison of TLA with other sensors based on different mechanisms for  $\text{SO}_2$  detection.

## 1. Energy transfer efficiency

$$E=1-F_{DA}/F_D$$

Herein, in the FRET process, E represents the efficiency of energy transfer.  $F_D$  indicates the fluorescence intensity of the donor when by itself.  $F_{DA}$  represents the fluorescence intensity of the donor when the acceptor is present.

## 2. Detection limit

$$\text{Detection limit} = 3\sigma/K$$

$\sigma$  represents the standard deviation of detection of 10 sensor blank solutions. K represents the slope of the linear relationship in the fluorescence emission spectrum of the sensor TLA.

## 3. The synthesis of donor

4-(1-methyl-1H-phenanthro[9,10-d]imidazol-2-yl)benzoic acid (0.5 mmol), dimethylamine (1.0 mmol), EDC (2.0 mmol) and DMAP (0.4 mmol) were added to dry DCM, and reacted 48 h in  $N_2$  condition. Then, the products were separated through column chromatography (silica gel: 200-300 mesh, DCM/MeOH, V/V, 70/1). The product TLA was received with 33% yield, and the structure was characterized by  $^1H$  NMR (400 MHz, DMSO- $d_6$ ):  $\delta$  = 3.028 (d, J=16.0 Hz, 6H), 4.328 (s, 3H), 7.637-7.790 (m, 6H), 7.948 (d, J=8.4 Hz, 2H), 8.612 (dd, J=12.4 and 8.0 Hz, 2H), 8.872 (d, J=8.4 Hz, 1H), 8.879 (d, J=8.0 Hz, 1H).

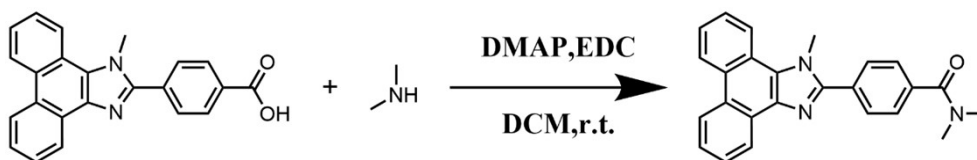

Scheme S1 The synthesis route of donor.

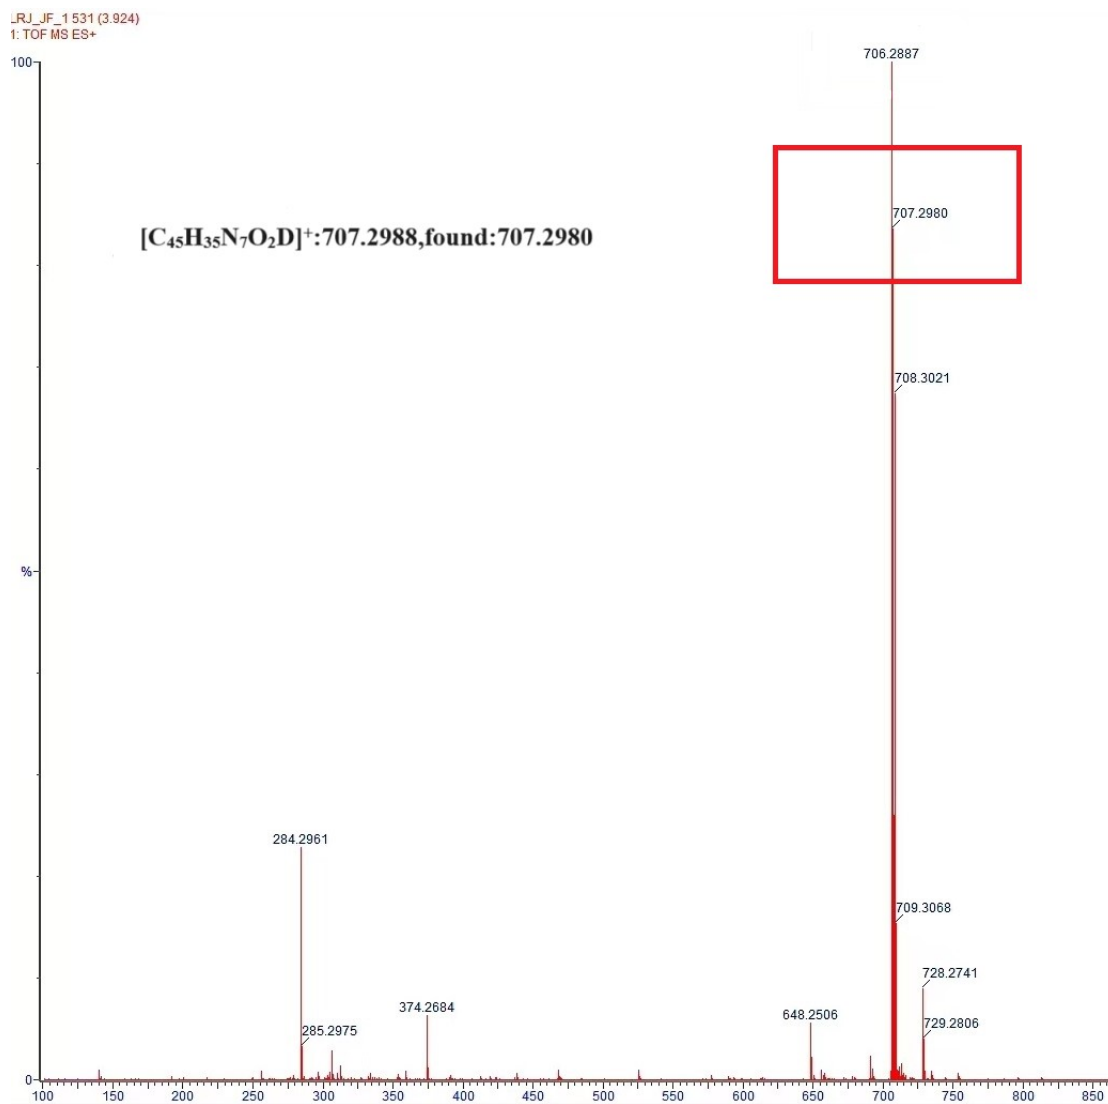

Fig. S1 The HRMS of TLA.

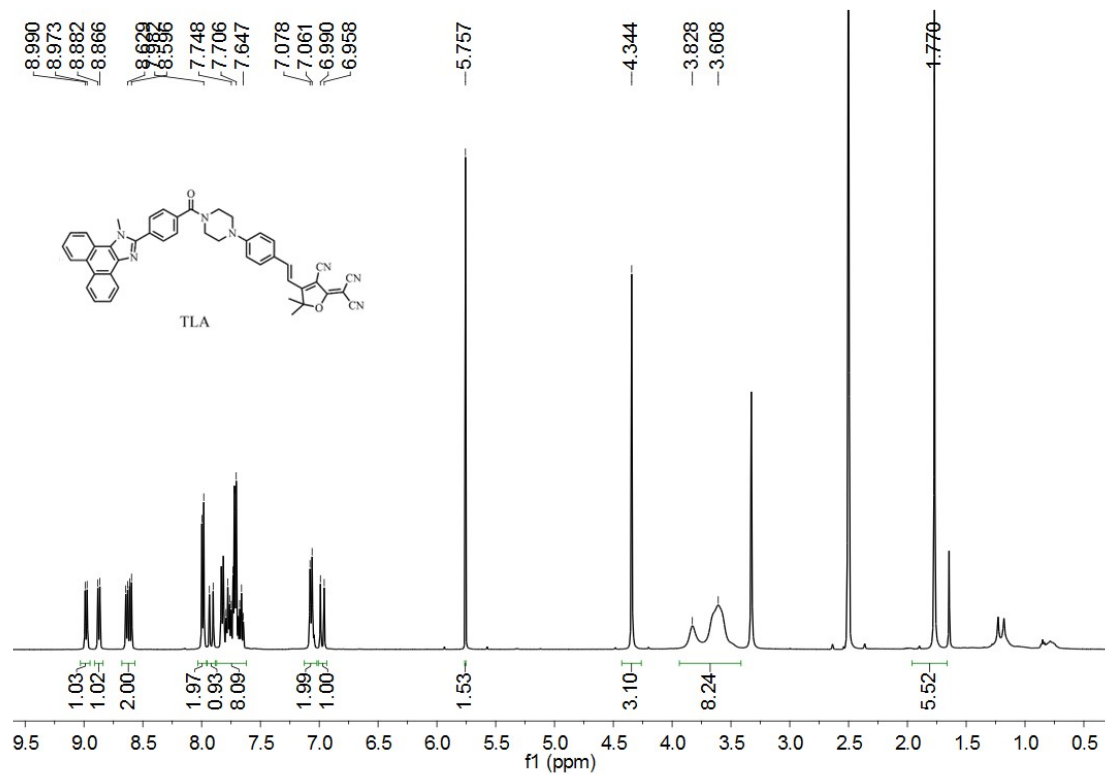

Fig. S2 The <sup>1</sup>H NMR of TLA.

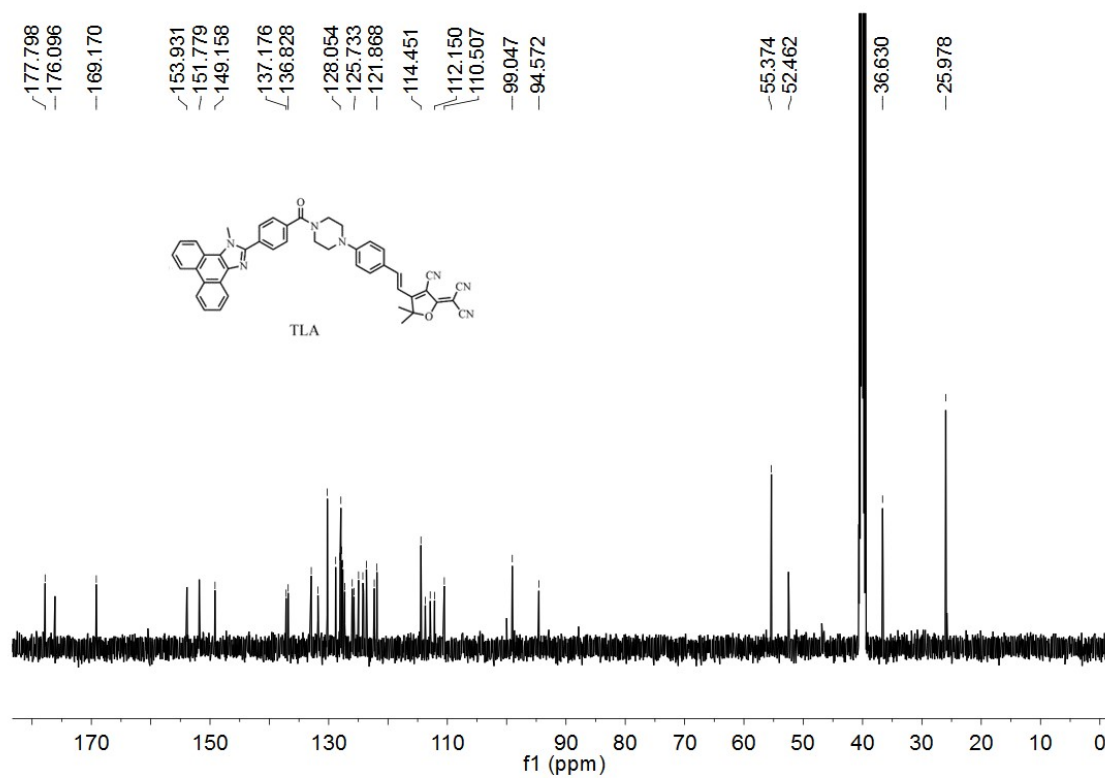

Fig. S3 The <sup>13</sup>C NMR of TLA.

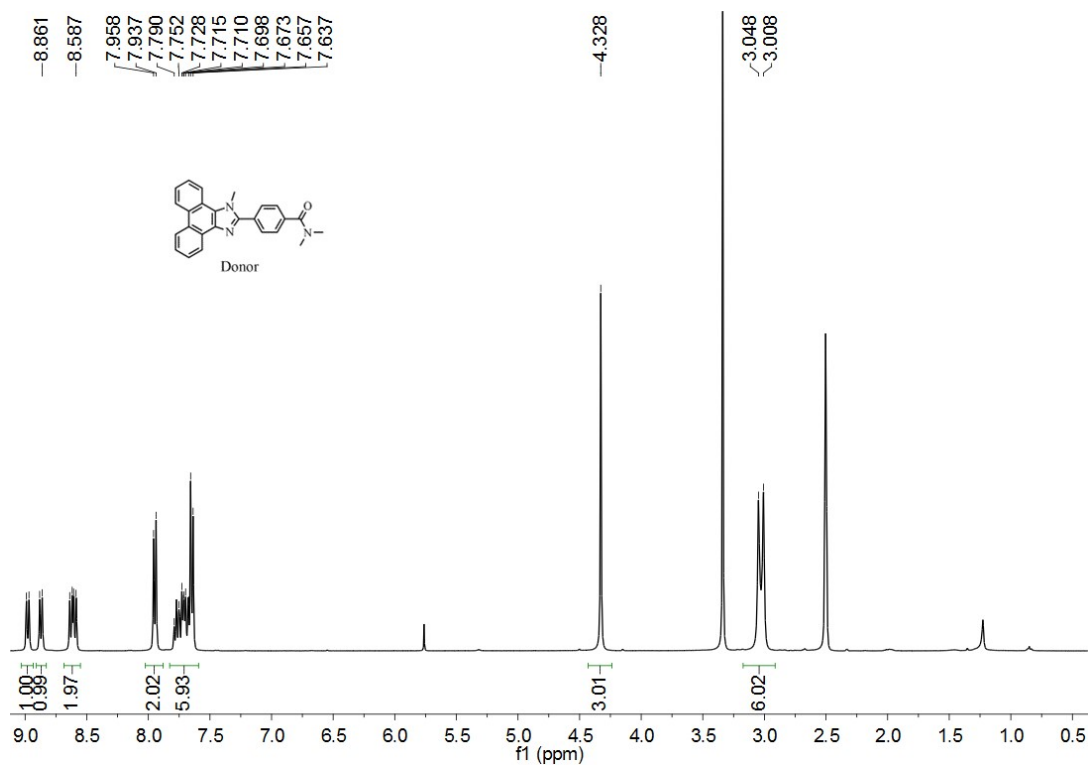

Fig. S4 The  $^1\text{H}$  NMR of donor.

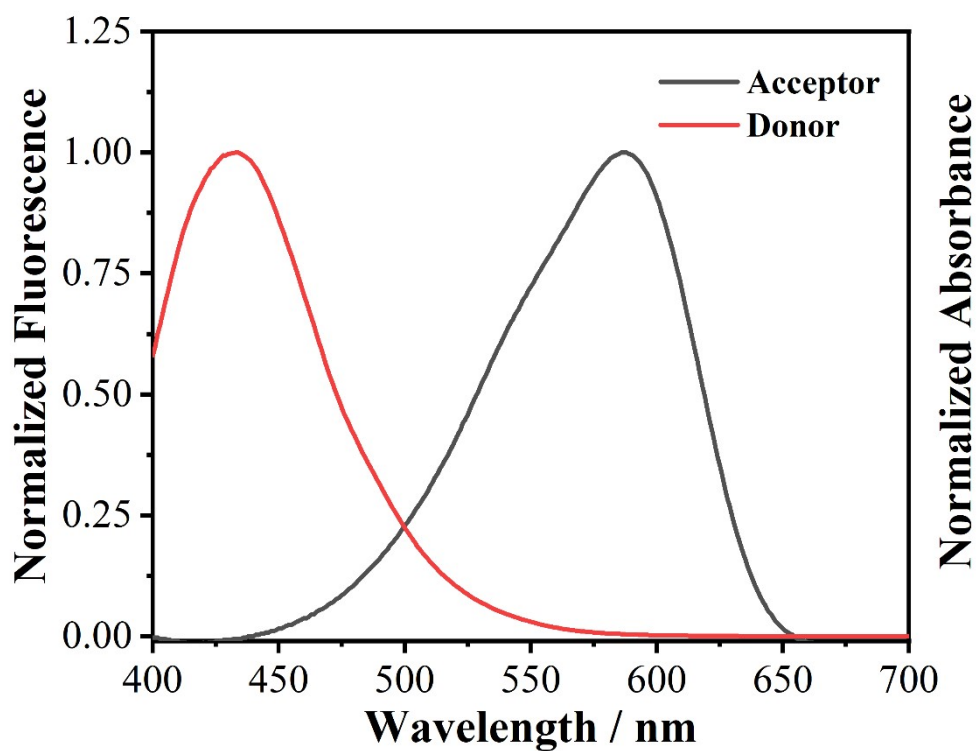

Fig. S5 The overlap of the normalized fluorescence spectra of donor and the absorbance spectra of acceptor.

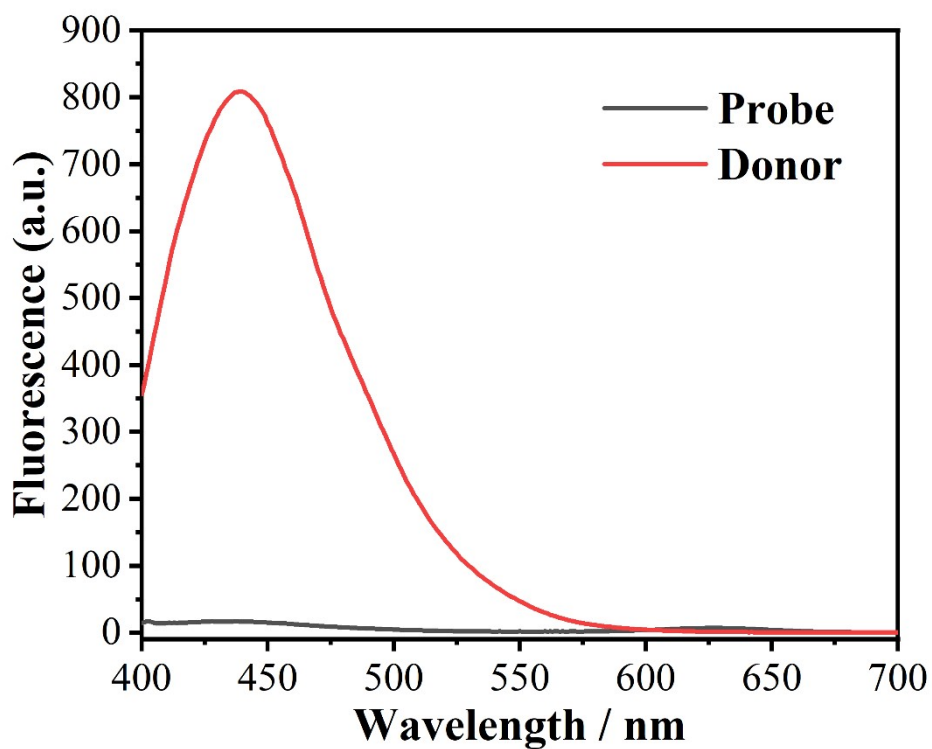

Fig. S6 The energy transfer efficiency.

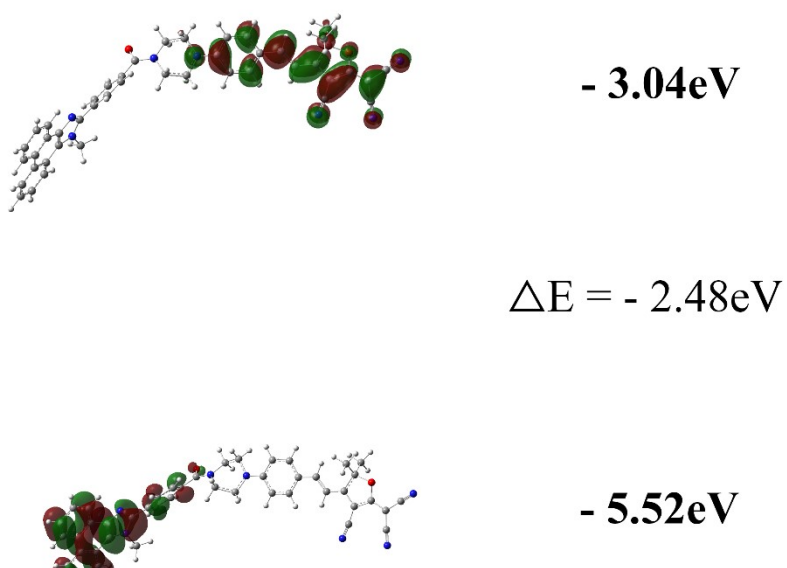

Fig. S7 HOMO and LUMO of TLA by DFT calculations



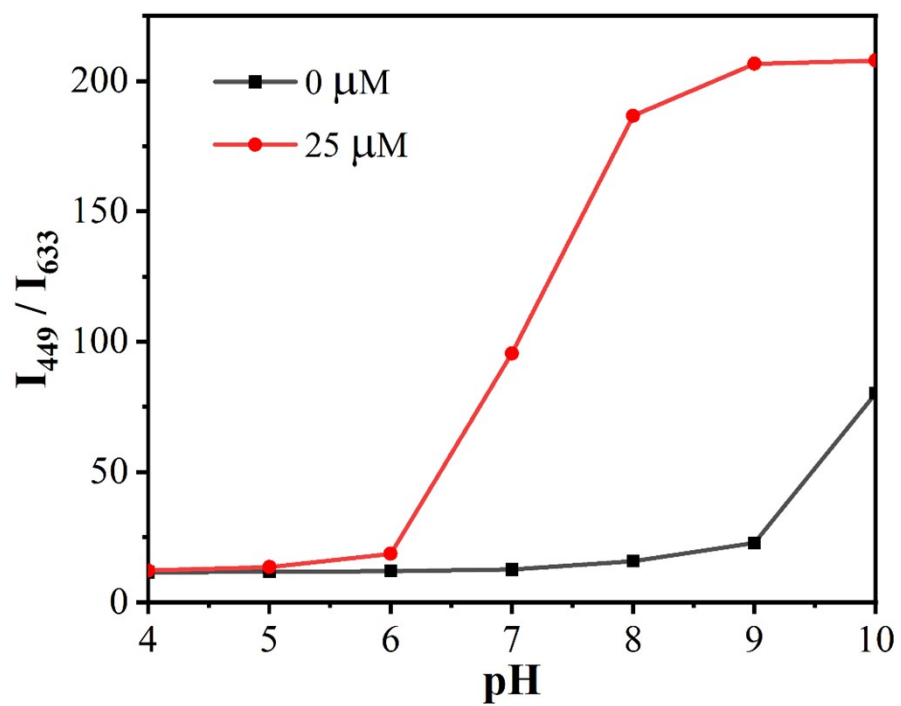

Fig. S8 The fluorescence of TLA relying on the variation of pH condition.

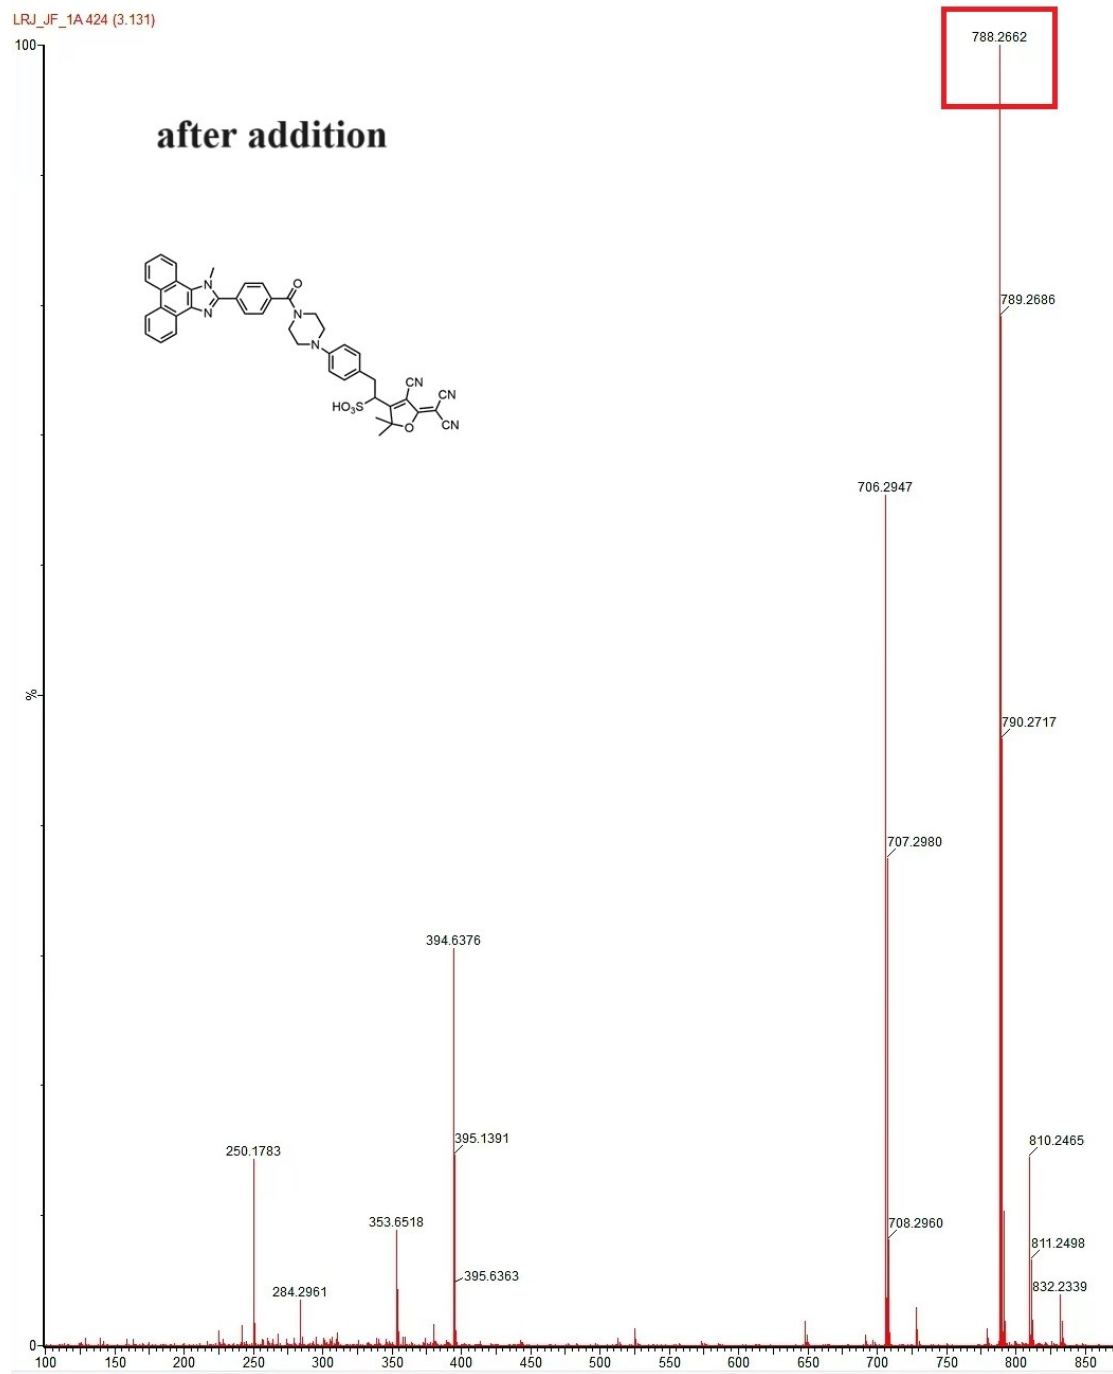

Fig. S9 The HRMS of the addition product.

(a) before addition

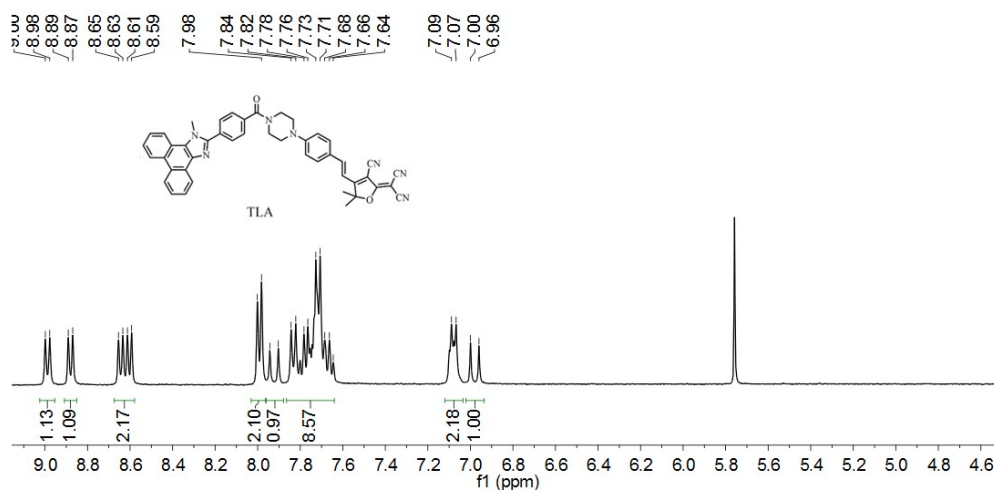

(b) after addition

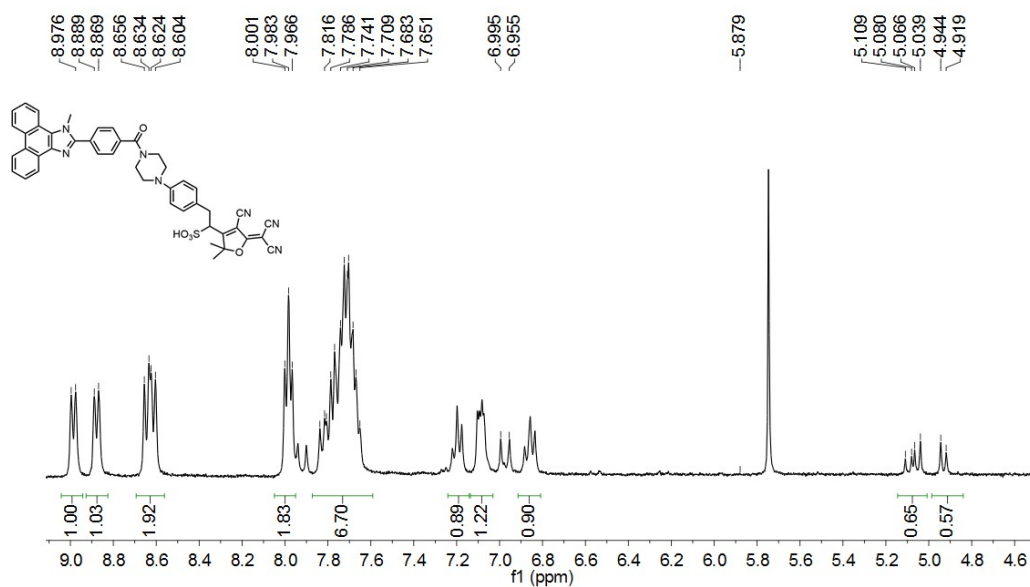

Fig. S10 <sup>1</sup>H NMR of the addition product.

Table S1 Comparison of TLA with other sensors based on different mechanisms for SO<sub>2</sub> detection.

| REF       | Type/mechanism         | structure                                                                                  | $\lambda_{\text{ex}}$ | LOD                        | Response time | stokes shift |
|-----------|------------------------|--------------------------------------------------------------------------------------------|-----------------------|----------------------------|---------------|--------------|
| 1         | AIE                    | 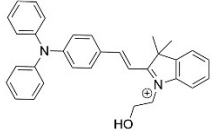          | 300/530               | 1.42 $\mu\text{M}$         | 30min         | 265nm        |
| 2         | AIE                    |           | 400                   | 27.22 $\mu\text{M}$        | About 20s     | 55nm         |
| 3         | ESIPT                  |           | 450                   | 330 $\mu\text{M}$          | 30s           | 92nm         |
| 4         | ICT                    |          | 390                   | 190nM                      | 30s           | 130nm        |
| 5         | TBET                   |         | 810                   | 0.09 $\mu\text{M}$         | 5min          | 118nm        |
| 6         | FRET                   |         | 405                   | 3.15 $\mu\text{M}$         | 60min         | 196nm        |
| 7         | Nanoreactor            | C11-BDP+PDMS-NH <sub>2</sub> +PS-PEO                                                       | /                     | 0.7 $\mu\text{M}$          | 65s           | /            |
| 8         | Electrochemical sensor | 3D-rGO/CB/GCE                                                                              | /                     | 52.3ppm                    | /             | /            |
| 9         | Nanozyme Sensor        | MIL-53(Fe/Mn)                                                                              | /                     | 0.05 $\mu\text{g mL}^{-1}$ | 20min         | /            |
| 10        | Fluorescence Sensor    | metal-organic framework-5-NH <sub>2</sub> /urushiol/PVP nanofiber composite films          | 365                   | 447 $\mu\text{M}$          | <20 s         | /            |
| This work | FRET                   | <br>TLA | 360                   | 0.44 $\mu\text{M}$         | 30min         | 273nm        |

1 S. Sun, K. Xue, Y. Zhao and Z. Qi, *Talanta*, 2024, **270**, 125568.

2 X. Yang, J. Tang, D. Zhang, X. Han, J. Liu, J. Li, Y. Zhao and Y. Ye, *Chem Commun (Camb)*, 2020, **56**, 13217-13220.

- 3 F. Huo, Q. Wu, C. Yin, W. Zhang and Y. Zhang, *Spectrochim Acta A Mol Biomol Spectrosc*, 2019, **214**, 429-435.
- 4 Q. Zhang, X. Hu, X. Dai, J. Sun and F. Gao, *J Mater Chem B*, 2021, **9**, 3554-3562.
- 5 W. Hu, L. Zeng, S. Zhai, C. Li, W. Feng, Y. Feng and Z. Liu, *Biomaterials*, 2020, **241**, 119910.
- 6 F. T. Liu, Y. P. Wang, P. F. Jiang and B. X. Zhao, *Food Chem*, 2024, **436**, 137755.
- 7 J. Li, X. Ma, W. Yang, C. Guo, J. Zhai and X. Xie, *Anal Chem*, 2021, **93**, 11758-11764.
- 8 K. Mi, L. Tong, M. Yu, Y. Zhao, H. Dong and S. Hou, *Anal Methods*, 2023, **15**, 3522-3531.
- 9 X. Yue, L. Fu, C. Wu, S. Xu and Y. Bai, *Foods*, 2023, **12**, 3581.
- 10 T. T. Li, X. Zhang, Y. Wang, X. Zhang, H. Ren, B. C. Shiu and C. W. Lou, *Langmuir*, 2023, **39**, 14441-14450.
